# Supplementary material for: Characterization and field-effect transistor performance of printed pentacene films prepared by photoconversion of a soluble precursor
Source: Royal Society of Chemistry journal article supplement (doi:10.1039/c3tc31083c), 2013-01-01
Supplement: c3tc31083c.pdf [file c3tc31083c.pdf]

## Supporting Information

### Characterization and Field-Effect Transistor Performance of Printed Pentacene Films Prepared by Photoconversion of the Soluble Precursor

Ken-ichi Nakayama,<sup>\*a,c</sup> Chika Ohashi,<sup>a</sup> Yoshisato Oikawa,<sup>a</sup> Takao Motoyama<sup>a,c</sup> and  
Hiroko Yamada<sup>\*b,c</sup>

<sup>a</sup> Department of Organic Device Engineering, Graduate School of Science and Engineering, Yamagata University, Yonezawa 992-8510, (Japan), Fax: (+81)238-26-3713, E-mail: nakayama@yz.yamagata-u.ac.jp

<sup>b</sup> Graduate School of Materials Science, Nara Institute of Science and Technology, Ikoma, 630-0192, (Japan), Fax: (+81)743-724-6042, E-mail: hyamada@ms.naist.jp

<sup>c</sup> Core Research for Evolutional Science and Technology (CREST), Japan Science and Technology Agency (JST), 7 Goban-cho, Chiyoda-ku 102-0076, Japan

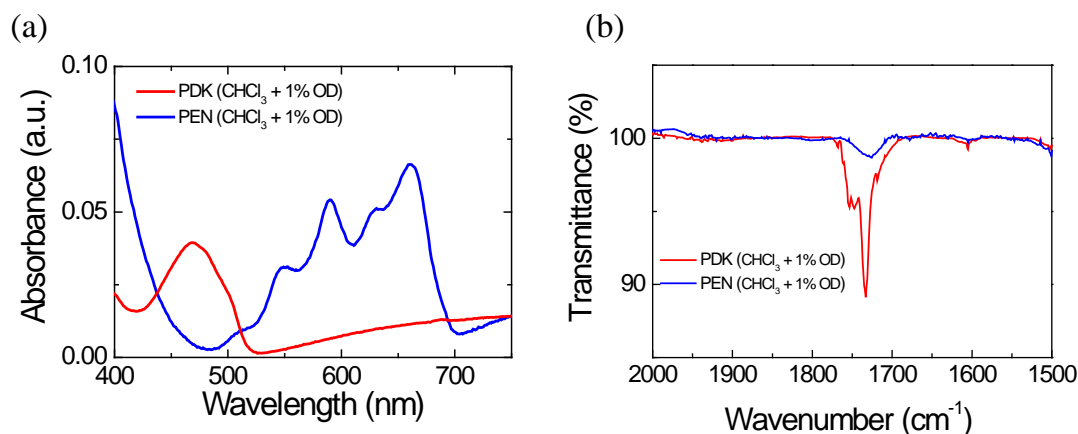

15

**Figure S1.** (a) UV/vis spectra and (b) FT-IR/ATR spectra, for the PDK films spin-coated from chloroform solution with 1% 1,8-octanedithiol before and after photoirradiation.

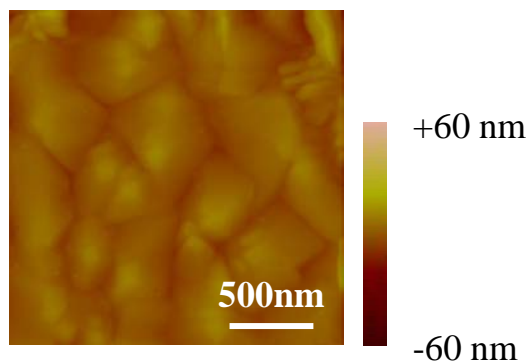

**Figure S2.** AFM image of a vacuum-deposited pentacene film on a HMDS-treated Si/SiO<sub>2</sub> substrate. The surface roughness RMS value was 6.7 nm.

20

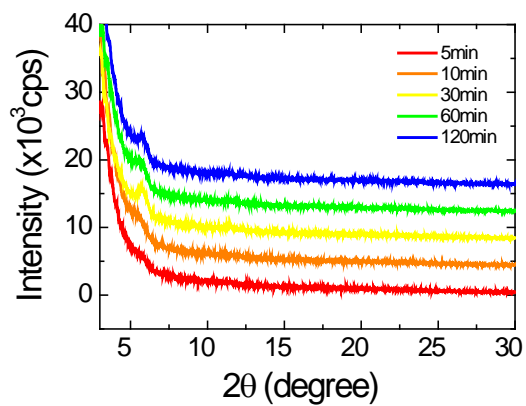

**Figure S3.** XRD patterns of photoconverted pentacene films with various photoirradiation times. **PDK** films were prepared from chloroform with 1% TCB on GR650-treated Si/SiO<sub>2</sub> substrates.
